# Supplementary material
Source: Research Square preprint supplement (doi:10.21203/rs.3.rs-9542279/v1)
Supplement: Supplementary file 1 [file 2945575bdb53c59d84e1d896.docx]

**Supplementary methods**

**Projection of inpatient utilization rates**

**Overview and notation**

We projected inpatient utilization rates (estimated number of inpatients per day per 100,000 population) for each prefecture, sex, and age group using historical data from 1999 to 2023 and generated projections for 2025–2050. Let denote calendar year, prefecture, sex, and age group. Let denote municipality, and the prefecture to which municipality belongs. Let denote the observed inpatient utilization rate in year for stratum ().

For each stratum, we fitted alternative models describing the temporal trajectory of inpatient utilization rates and obtained model-based predicted values for , where q indexes the model.

To reflect uncertainty regarding future health care utilization trends, we evaluated three classes of projection models:

(1) an epidemiologic model based on the age–period–cohort (APC) framework;1,2

(2) statistical trend models (Gompertz, linear, log-linear, logarithmic, logistic, probit, quadratic, restricted spline, and spline);3,4 and

(3) conservative scenario-based models reflecting policy-relevant benchmark assumptions.

All models were fitted separately for each prefecture, sex, and age-group stratum.

**Model specifications**

For each model, denotes time (years since 1999). Model parameters were estimated using least squares or maximum likelihood depending on the functional form, either on the original or transformed scale as appropriate.

(1) Epidemiologic projection model

Age–period–cohort model1,2

The age–period–cohort (APC) model decomposes temporal variation in utilization rates into three components: age effects, period effects, and cohort effects. Age effects represent differences in health care utilization associated with biological aging and disease incidence across age groups. Period effects capture influences affecting all age groups simultaneously at a given time, such as medical innovations, health policy changes, reimbursement reforms, or system-wide shifts in care delivery. Cohort effects reflect generational differences associated with early-life exposures, behavioral patterns, and long-term health trajectories. Formally, the APC model assumes

where is a baseline level for each prefecture–sex stratum; represents the age effect; represents the period effect; and represents the birth cohort effect with birth cohort defined as .

Because age, period, and cohort are linearly dependent, the APC model involves an identification problem. Following standard APC modelling practice, estimable functions were obtained by imposing appropriate constraints on the parameters, allowing estimation of the net drift and nonlinear deviations associated with period and cohort effects. Future utilization rates were projected by extrapolating estimated period and cohort trends beyond the observed period while maintaining the estimated age structure. This framework allows the model to incorporate both demographic aging and secular changes in health care utilization patterns.

(2) Statistical trend models3,4

Statistical trend models describe the empirical trajectory of inpatient utilization rates as a function of time without explicitly decomposing demographic components. These models are widely used in epidemiology and health services research to capture long-term trends, nonlinear trajectories, or saturation effects.

The following functional forms were evaluated.

Gompertz model

The Gompertz model allows nonlinear change with gradual deceleration over time:

where represents the asymptotic level; determines the initial displacement; and controls the rate of deceleration. This form captures rapid early change followed by stabilization, a pattern often observed in epidemiologic or technological diffusion processes.

Linear model

The linear model assumes a constant absolute change in utilization over time:

where represents the annual change in utilization rate. This model represents the simplest deterministic trend and assumes that past changes continue at a constant rate.

Log-linear model

The log-linear model assumes a constant proportional change over time:

This specification implies a constant percentage change per year and is widely used in epidemiologic forecasting.

Logarithmic model

The logarithmic model allows the rate of change to slow over time:

This specification captures rapid initial changes followed by gradual stabilization.

Logistic model

The logistic model represents an S-shaped trajectory approaching asymptotic levels:

where and denote lower and upper asymptotes; represents the slope; and is the inflection point. This model is appropriate when utilization trends approach structural limits.

Probit model

The probit model represents a smooth transition between lower and upper bounds using the cumulative normal distribution:

where denotes the cumulative normal distribution function. Like the logistic model, it represents bounded growth or decline dynamics.

Quadratic polynomial model

A quadratic polynomial allows flexible curvature without imposing monotonicity:

This specification allows acceleration or deceleration of trends over time.

Spline model

The spline model allows flexible nonlinear trends by representing the time trajectory as a piecewise polynomial function joined at predefined knot locations.

Let , , …, denote spline knots placed within the observed time range. The model can be expressed as

where ; ; and are knot locations.

Spline models allow flexible curvature in the temporal trend without imposing a specific functional form. This specification can capture complex nonlinear trajectories that may arise from gradual structural changes in health care utilization.

Restricted spline model (restricted cubic spline)

The restricted spline model, also known as a restricted cubic spline, imposes linear constraints in the tails of the function while retaining flexible curvature within the interior of the observed data range.

The model can be written as

where denotes restricted cubic spline basis functions; knots , , …, are placed within the observed time range. Unlike unrestricted spline models, the restricted spline constrains the function to be linear beyond the boundary knots, which improves extrapolation stability and reduces unrealistic behavior in long-term projections. In this study, the restricted spline was implemented using a natural spline specification (ns(t, df = 3)), corresponding to 3 degrees of freedom and 2 internal knots. The internal knots were automatically placed at approximately the 33rd and 67th percentiles of the observed time variable, while the boundary knots were set at the minimum and maximum observed years. This specification allows moderate nonlinear flexibility while maintaining stable extrapolation and avoiding overfitting.

(3) Conservative scenario-based models

In addition to statistical extrapolation models, we evaluated conservative benchmark scenarios designed to represent plausible policy-relevant trajectories under minimal structural assumptions.

Constant from 2023 (static benchmark)

This model assumes that utilization remains constant at the most recent observed level:

This scenario represents a static benchmark in which recent utilization patterns persist without further change.

Exponential decay models (fixed decay parameter )

These models assume an exponential decline in utilization over time:

where is estimated and represents alternative decay speeds. Taking logarithms yields

Larger values of correspond to faster declines in inpatient utilization, potentially reflecting technological improvements, shorter hospital stays, improved outpatient management, and structural shifts toward ambulatory care.

**References**

1. Holford TR. The Estimation of Age, Period and Cohort Effects for Vital Rates. *Biometrics*. 1983;39(2):311-324. doi:10.2307/2531004

2. Clayton D, Schifflers E. Models for temporal variation in cancer rates. II: Age–period–cohort models. *Stat Med*. 1987;6(4):469-481. doi:10.1002/sim.4780060406

3. Royston P, Parmar MKB. Flexible parametric proportional-hazards and proportional-odds models for censored survival data, with application to prognostic modelling and estimation of treatment effects. *Stat Med*. 2002;21(15):2175-2197. doi:10.1002/sim.1203

4. Survival analysis TSD. June 10, 2025. Accessed March 26, 2026. https://sheffield.ac.uk/nice-dsu/tsds/survival-analysis
